# Supplementary material for: EGCG stimulates the recruitment of brite adipocytes, suppresses adipogenesis and counteracts TNF-α-triggered insulin resistance in adipocytes
Source: Royal Society of Chemistry journal article supplement (doi:10.1039/c8fo00167g), 2018-01-01
Supplement: c8fo00167g2.pdf [file c8fo00167g2.pdf]

### Supplementary Fig.1

(A) Two days after achieving post-confluence (day 0), 3T3-L1 preadipose cells were stimulated by MDI medium with/without various concentration of EGCG. The relative level of TNF- $\alpha$  in the cell culture supernatant were detected by corresponding kit. (B) Mature adipocytes were pre-treated with or without EGCG (20  $\mu$ M) for 12 h and then cultured with/without TNF- $\alpha$  (100 nM) for 24 h, and then phosphorylation of AMPK and ACC were detected in cells using western blots. AMPK and ACC were served as controls. Data was presented as the mean  $\pm$  SD,  $n \geq 3$ . Values having different superscripts are significantly different,  $p < 0.05$ .
